# Supplementary material for: Long-Term Phenotypic and Proteomic Changes Following Vitrified Embryo Transfer in the Rabbit Model
Source: MDPI journal article supplement (doi:10.3390/ani10061043), 2020-06-17
Supplement: s1 [file s1]

**S1 Table.** Differentially expressed proteins in liver tissue between animals born from vitrified-transferred embryos and those conceived naturally.

| Uniprot accession | Gene name                                                | Ratio* |
|-------------------|----------------------------------------------------------|--------|
| G1TQG1            | NADH:ubiquinone oxidoreductase subunit B9(NDUFB9)        | -2,131 |
| G1TM55            | ribosomal protein S6(RPS6)                               | -1,849 |
| G1TH09            | 60S ribosomal protein L7a(LOC100341006)                  | -1,755 |
| G1TT27            | ribosomal protein L8(RPL8)                               | -1,751 |
| G1SVW5            | ribosomal protein L4(RPL4)                               | -1,637 |
| G1TFX2            | alpha-1-antitrypsin(LOC100328621)                        | -1,583 |
| G1T4E7            | signal peptidase complex subunit 2(SPCS2)                | -1,470 |
| G1TUC2            | CCHC-type zinc finger nucleic acid binding protein(CNBP) | -1,402 |
| G1U6B4            | ATP synthase subunit e, mitochondrial(LOC108178113)      | -1,390 |
| G1SN00            | kininogen 1(KNG1)                                        | -1,349 |
| G1T9I4            | sorcin(SRI)                                              | -1,237 |
| G1SEH7            | NADH:ubiquinone oxidoreductase subunit B8(NDUFB8)        | -1,212 |
| G1TKV4            | histone H3(LOC103350067)                                 | -1,157 |
| G1SLD5            | hypoxia up-regulated 1(HYOU1)                            | -1,092 |
| G1SCT1            | prolyl endopeptidase(PREP)                               | -1,059 |
| U3KMP8            | myosin IB(MYO1B)                                         | -0,996 |
| G1TJW1            | 40S ribosomal protein S8(LOC100352057)                   | -0,987 |
| G1U9R4            | apolipoprotein B(APOB)                                   | -0,968 |
| G1SML9            | DnaJ heat shock protein family (Hsp40) member A1(DNAJA1) | -0,938 |
| G1U416            | asialoglycoprotein receptor 1(ASGR1)                     | -0,931 |
| O62648            | sulfotransferase family 2A member 1(SULT2A1)             | -0,884 |
| G1TZQ6            | NADH:ubiquinone oxidoreductase subunit A10(NDUFA10)      | -0,868 |
| G1TCW2            | osteoclast stimulating factor 1(OSTF1)                   | -0,846 |
| G1TM29            | aldehyde dehydrogenase 16 family member A1(ALDH16A1)     | -0,796 |
| G1TSY8            | alpha-1-microglobulin/bikunin precursor(AMBP)            | -0,780 |
| G1TPL7            | dipeptidyl peptidase 3(DPP3)                             | -0,691 |
| G1SE10            | 2-hydroxyacyl-CoA lyase 1(HACL1)                         | -0,686 |
| G1TYY5            | LIM and SH3 protein 1(LASP1)                             | -0,665 |
| G1T7G4            | growth arrest specific 2(GAS2)                           | -0,625 |
| G1SYV9            | talin 1(TLN1)                                            | -0,613 |
| G1T6D1            | ribosomal protein L23(RPL23)                             | -0,597 |
| G1U6X6            | heterogeneous nuclear ribonucleoprotein H2(LOC100339065) | -0,548 |
| G1SYT7            | peptidase, mitochondrial processing beta subunit(PMPCB)  | -0,533 |
| G1SHF3            | nitrilase 1(NIT1)                                        | -0,517 |
| G1TCE9            | hydroxysteroid dehydrogenase like 2(HSDL2)               | -0,504 |
| G1T7T6            | USO1 vesicle transport factor(USO1)                      | -0,498 |

|                |                                                                                                              |        |
|----------------|--------------------------------------------------------------------------------------------------------------|--------|
| G1SZT8         | SEC13 homolog, nuclear pore and COPII coat complex component(SEC13)                                          | -0,492 |
| B2ZDY6         | t-complex 1(TCP1)                                                                                            | -0,457 |
| O77768         | heterogeneous nuclear ribonucleoprotein C (C1/C2)(HNRNPC)                                                    | -0,439 |
| G1SNB1         | carboxylesterase 3(CES3)                                                                                     | -0,412 |
| G1U7C5         | ribosome binding protein 1(RRBP1)                                                                            | -0,404 |
| G1T3D7         | N-acetylneuraminate synthase(NANS)                                                                           | -0,396 |
| G1SZ47         | ribosomal protein S23(RPS23)                                                                                 | -0,378 |
| AOA0G2JH2<br>O | heat shock protein 90 alpha family class A member 1(HSP90AA1)                                                | -0,336 |
| G1SCN8         | chaperonin containing TCP1 subunit 3(CCT3)                                                                   | -0,297 |
| G1TBS1         | Parkinsonism associated deglycase(PARK7)                                                                     | -0,292 |
| G1U7L4         | heat shock protein family A (Hsp70) member 5(HSPA5)                                                          | -0,292 |
| G1U032         | StAR related lipid transfer domain containing 10(STARD10)                                                    | -0,175 |
| G1SKT4         | ATP synthase, H <sup>+</sup> transporting, mitochondrial F1 complex, alpha subunit 1, cardiac muscle(ATP5A1) | 0,193  |
| G1TS42         | amylo-alpha-1, 6-glucosidase, 4-alpha-glucanotransferase(AGL)                                                | 0,557  |
| G1SP40         | amidohydrolase domain containing 1(AMDHD1)                                                                   | 0,687  |
| G1SR29         | ATPase H <sup>+</sup> transporting V1 subunit A(ATP6V1A)                                                     | 0,689  |
| G1T3R4         | alcohol dehydrogenase class-2 isozyme 1(ADH2-1)                                                              | 0,705  |
| G1T295         | epoxide hydrolase 1(EPHX1)                                                                                   | 0,766  |
| G1T8P1         | aldehyde dehydrogenase 1 family member L1(ALDH1L1)                                                           | 0,832  |
| Q75NJ2         | aldehyde dehydrogenase 1 family member A1(ALDH1A1)                                                           | 0,951  |
| G1U0Z4         | agmatinase(AGMAT)                                                                                            | 0,959  |
| G1TY06         | glutathione S-transferase mu 2 (muscle)(GSTM2)                                                               | 1,249  |
| B7NZF9         | nucleophosmin (nucleolar phosphoprotein B23, numatrin)(NPM1)                                                 | 1,719  |
| G1SZH0         | retinol binding protein 4(RBP4)                                                                              | 1,872  |
| G1SMM7         | small nuclear ribonucleoprotein D3 polypeptide(SNRPD3)                                                       | 2,211  |
| G1U1M3         | aminoacyl tRNA synthetase complex interacting multifunctional protein 1(AIMP1)                               | 2,351  |
| P04068         | epoxide hydrolase 1(EPHX1)                                                                                   | 2,648  |
| G1TCQ2         | fatty acid binding protein 1(FABP1)                                                                          | 2,754  |
| G1TNI4         | glutathione S-transferase Yb-3(LOC100357148)                                                                 | 2,921  |
| G1TMP1         | keratin, type I cytoskeletal 18(LOC100008885)                                                                | 3,948  |

---

\*Ratio represents the fold change (vitrified-transferred/naturally conceived).
