# Supplementary material for: Long-Term Phenotypic and Proteomic Changes Following Vitrified Embryo Transfer in the Rabbit Model
Source: MDPI journal article supplement (doi:10.3390/ani10061043), 2020-06-17

**S1 Figure.** Pie charts showing the distribution of the differentially expressed proteins between animals born from vitrified-transferred embryos and those conceived naturally based on their molecular function, biological process and cellular component.

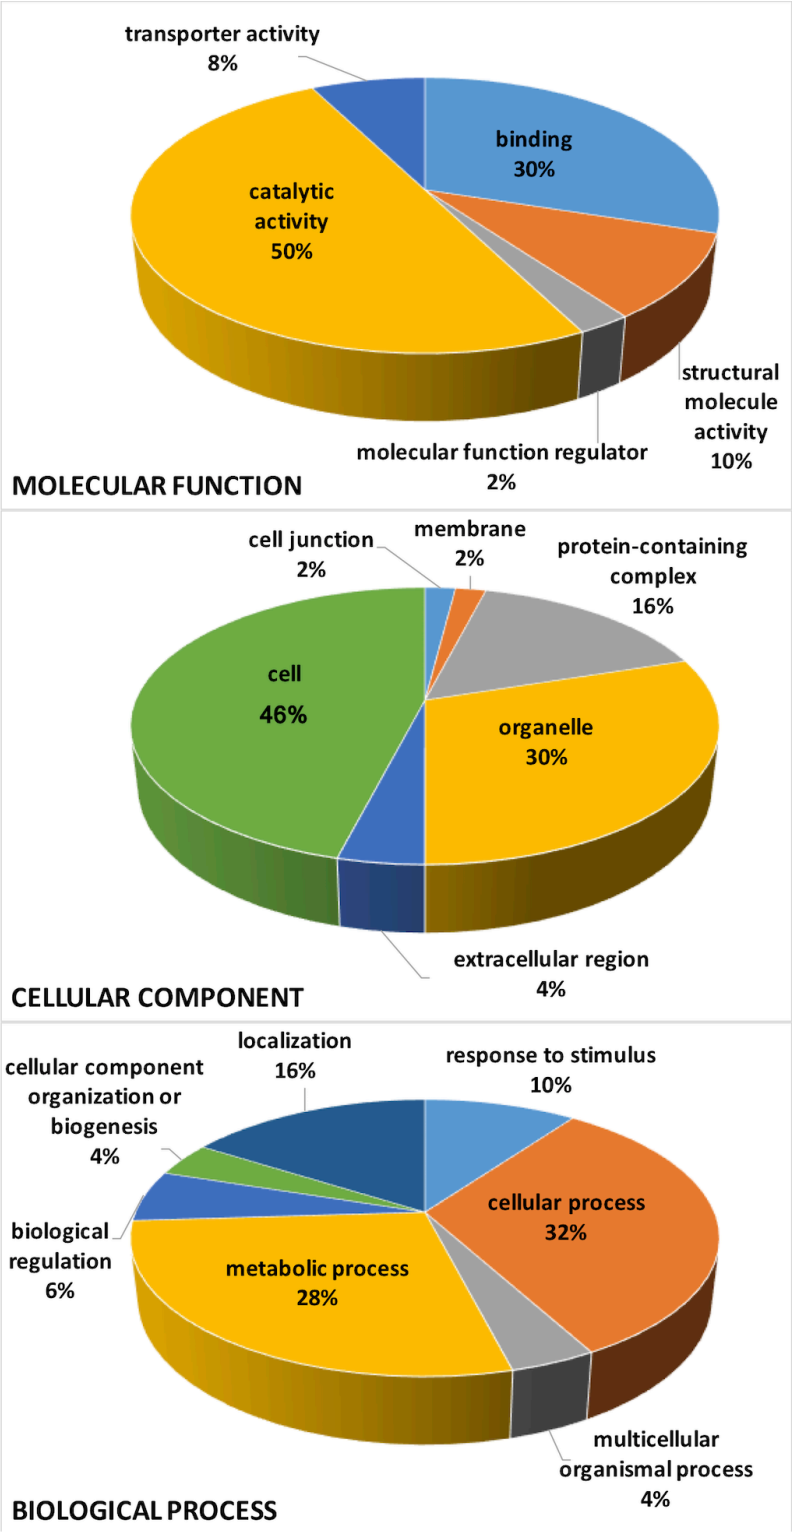

Supplement: s1 [file s1]
