# Supplementary material for: Long-Term Phenotypic and Proteomic Changes Following Vitrified Embryo Transfer in the Rabbit Model
Source: MDPI journal article supplement (doi:10.3390/ani10061043), 2020-06-17
Supplement: s1 [file s1]

**S2 Table.** Functional analysis of differential expressed proteins in liver tissue between animals born from vitrified-transferred embryos and those conceived naturally.

| Category* | Term                                                             | Count | p-value |
|-----------|------------------------------------------------------------------|-------|---------|
| BP        | toxin transport                                                  | 4     | 0,000   |
| BP        | mitochondrial electron transport, NADH to ubiquinone             | 3     | 0,001   |
| BP        | translation                                                      | 6     | 0,002   |
| BP        | protein folding                                                  | 4     | 0,006   |
| BP        | 10-formyltetrahydrofolate catabolic process                      | 2     | 0,010   |
| BP        | positive regulation of protein localization to Cajal body        | 2     | 0,041   |
| BP        | retinol metabolic process                                        | 2     | 0,056   |
| BP        | positive regulation of telomerase RNA localization to Cajal body | 2     | 0,066   |
| BP        | protein stabilization                                            | 3     | 0,071   |
| BP        | ATP synthesis coupled proton transport                           | 2     | 0,080   |
| BP        | one-carbon metabolic process                                     | 2     | 0,090   |
| BP        | biosynthetic process                                             | 2     | 0,094   |
| BP        | binding of sperm to zona pellucida                               | 2     | 0,099   |
| CC        | extracellular exosome                                            | 34    | 0,000   |
| CC        | myelin sheath                                                    | 7     | 0,000   |
| CC        | mitochondrial respiratory chain complex I                        | 4     | 0,000   |
| CC        | cell body                                                        | 4     | 0,001   |
| CC        | cytosol                                                          | 10    | 0,003   |
| CC        | membrane                                                         | 10    | 0,006   |
| CC        | focal adhesion                                                   | 6     | 0,010   |
| CC        | endoplasmic reticulum chaperone complex                          | 2     | 0,029   |
| CC        | zona pellucida receptor complex                                  | 2     | 0,038   |
| CC        | chaperonin-containing T-complex                                  | 2     | 0,043   |
| CC        | cytoplasm                                                        | 15    | 0,076   |
| MF        | aldehyde dehydrogenase (NAD) activity                            | 3     | 0,000   |
| MF        | structural constituent of ribosome                               | 6     | 0,003   |
| MF        | poly(A) RNA binding                                              | 11    | 0,008   |
| MF        | hydroxymethyl-, formyl- and related transferase activity         | 2     | 0,011   |
| MF        | formyltetrahydrofolate dehydrogenase activity                    | 2     | 0,011   |
| MF        | proton-transporting ATPase activity, rotational mechanism        | 2     | 0,055   |
| MF        | ATPase activity                                                  | 3     | 0,060   |
| MF        | peptidase activity                                               | 2     | 0,071   |

|       |                                              |   |       |
|-------|----------------------------------------------|---|-------|
| MF    | glutathione transferase activity             | 2 | 0,091 |
| MF    | NADH dehydrogenase (ubiquinone) activity     | 2 | 0,097 |
| <hr/> |                                              |   |       |
| KEGG  | Ribosome                                     | 7 | 0,001 |
| KEGG  | Metabolism of xenobiotics by cytochrome P450 | 5 | 0,001 |
| KEGG  | Chemical carcinogenesis                      | 5 | 0,003 |
| KEGG  | Oxidative phosphorylation                    | 5 | 0,007 |
| KEGG  | Parkinson's disease                          | 5 | 0,010 |
| KEGG  | Protein processing in endoplasmic reticulum  | 5 | 0,015 |
| KEGG  | Drug metabolism - cytochrome P450            | 3 | 0,072 |
| KEGG  | Alzheimer's disease                          | 4 | 0,074 |
| KEGG  | Huntington's disease                         | 4 | 0,099 |

---

\*Functional analysis was referred to the GO term annotation according to the biological process (BP), cellular component (CC) and molecular function (MF) classification, and the KEGG pathways in which they are involved.
